# Supplementary material for: Quality controls, bias, and seasonality of CO 2 columns in the boreal forest with Orbiting Carbon Observatory-2, Total Carbon Column Observing Network, and EM27/SUN measurements
Source: Copernicus journal article supplement (doi:10.5194/amt-13-5033-2020), 2020-09-28
Supplement: Supplementary file 1 [file amt-13-5033-2020-supplement.zip]

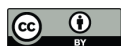

## *Supplement of*

# **Quality controls, bias, and seasonality of CO<sub>2</sub> columns in the boreal forest with Orbiting Carbon Observatory-2, Total Carbon Column Observing Network, and EM27/SUN measurements**

**Nicole Jacobs et al.**

*Correspondence to:* William R. Simpson ([wrsimpson@alaska.edu](mailto:wrsimpson@alaska.edu))

- [amt-13-5033-2020-supplement-title-page.pdf](#)
- [Supplement\\_OCO2bias-QC-inBorealForests\\_25Aug20.pdf](#)
- [UAF\\_EM27\\_xco2data\\_20160804-20181106\\_3Dec19.nc](#)

The copyright of individual parts of the supplement might differ from the CC BY 4.0 License.
