# Supplementary material for: Quality controls, bias, and seasonality of CO 2 columns in the boreal forest with Orbiting Carbon Observatory-2, Total Carbon Column Observing Network, and EM27/SUN measurements
Source: Copernicus journal article supplement (doi:10.5194/amt-13-5033-2020), 2020-09-28
Supplement: Supplementary file 3 [file amt-13-5033-2020-supplement.zip]

Archive with 3 entries (3 files):
- Supplement_OCO2bias-QC-inBorealForests_25Aug20.pdf
- amt-13-5033-2020-supplement-title-page.pdf
- UAF_EM27_xco2data_20160804-20181106_3Dec19.nc
